# Supplementary material for: The Effectiveness of Commercial Household Ultraviolet C Germicidal Devices in Thailand
Source: Research Square preprint supplement (doi:10.21203/rs.3.rs-582289/v1), 2021-06-18
Supplement: Supplementary file 1 [file af563f6f1a745cbc47073de4.docx]

UVC devices specification

|  |  | UV source | UV light wave range (nm) | UV light power  (W) | Other considerations | Product |
| --- | --- | --- | --- | --- | --- | --- |
| 1. UV-C disinfection desk lamp | M6 | Low pressure mercury | 253.7 | 24 | Recommendation  Disinfection time  Bathroom/kitchen 15 min  Bedroom 30 min  Living room 45 min | 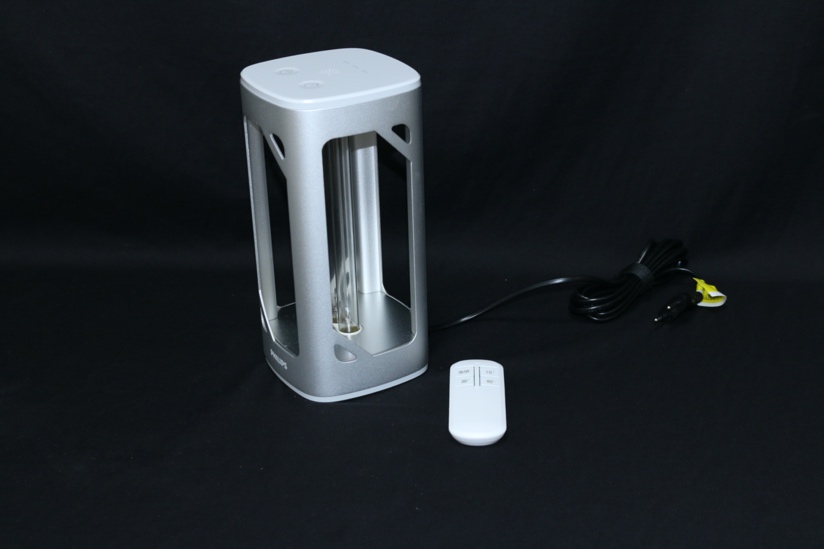 |
| 1. Uadisinfecting table lamp | M5 | Low pressure mercury |  | 38 | Sanitary ware, smaller room 15 min  Master bedroom, small living room 30 min  Main living room, larger room 60 min | 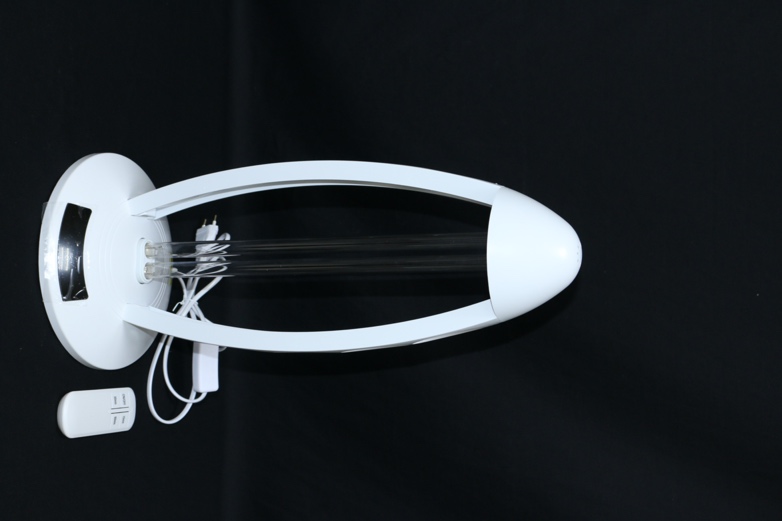 |
| 1. UVC germicidal lamp (G8 T5) | M7 | Low pressure mercury | 253.7 | 8 | NA | 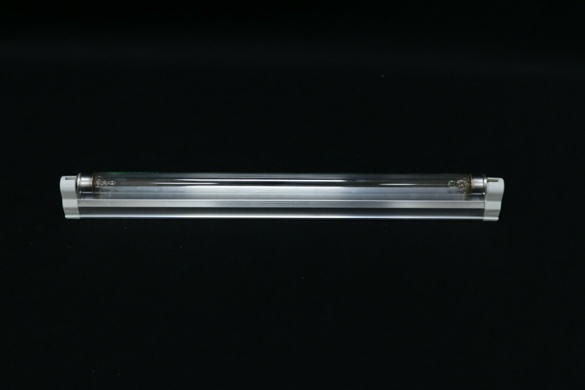 |
| 1. Multi-functional UV sterilizing box (SUV-006) | L3 | LED | 270-285 | 5-8 | 180 seconds per cycle | 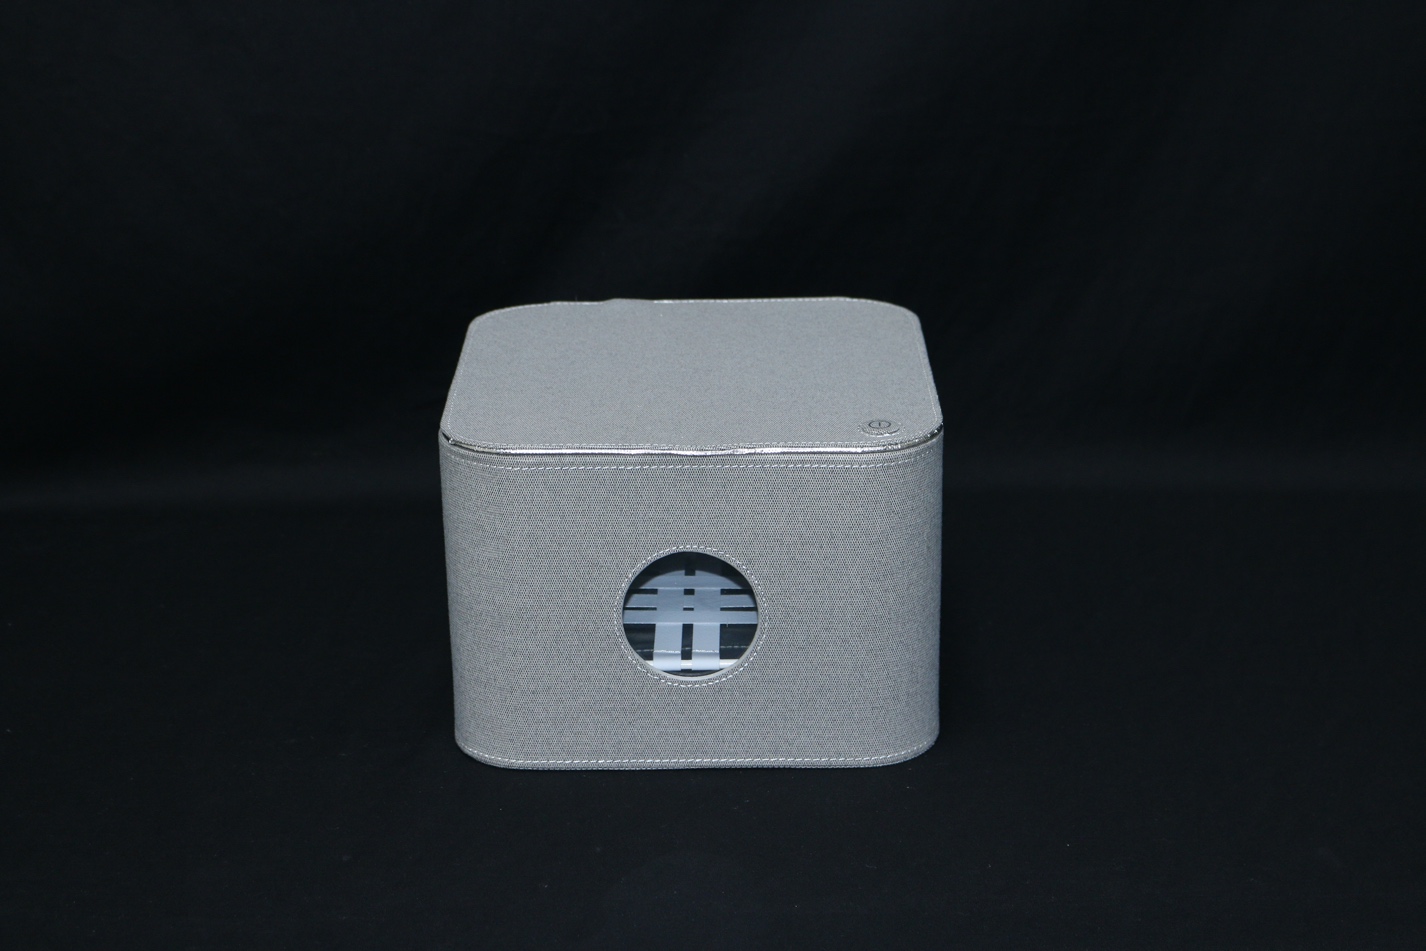 |
| 1. Multifunctional bactericidal bag L3 | L2 | LED | 265 | 8 | NA | 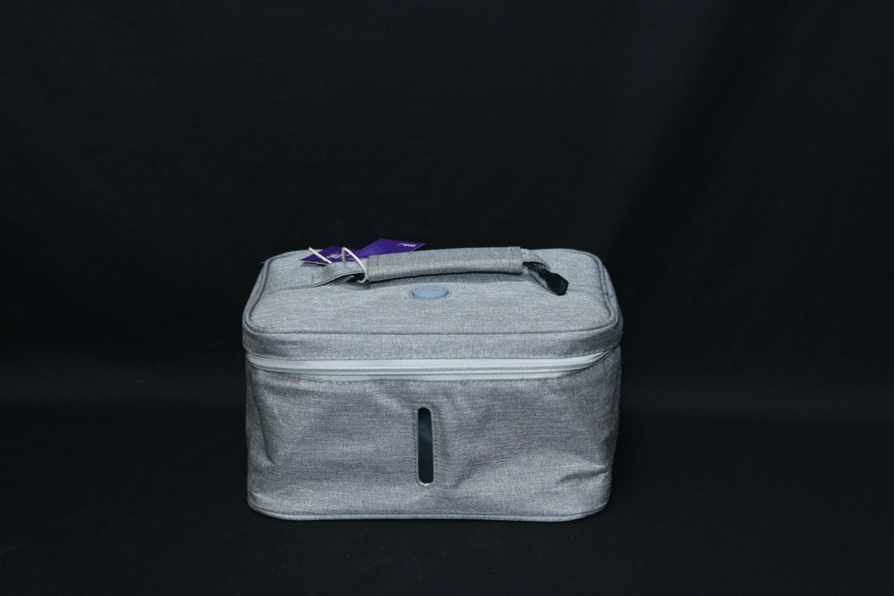 |
| 1. Pocket UV germicidal lamp | M1 | Low pressure mercury |  | 2.5 | Dual mode: 15 and 30 min  Range of application: < 2m2 | 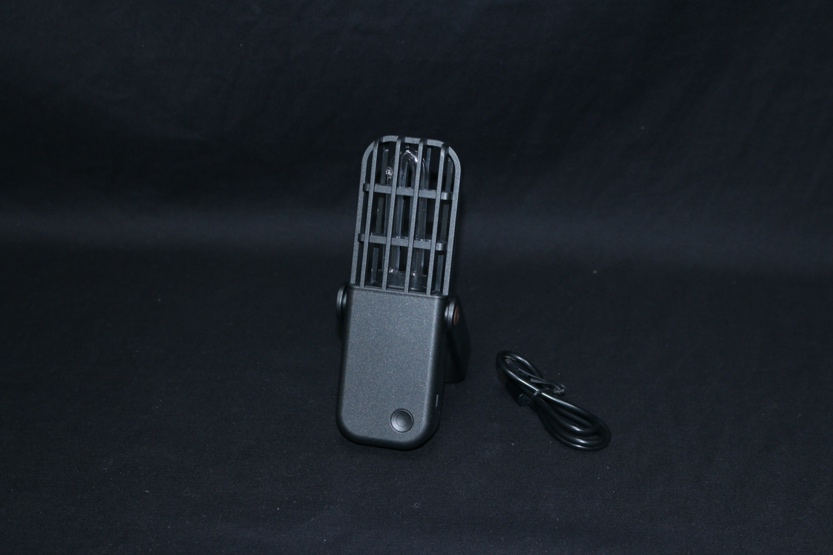 |
| 1. Portable UV Sterilizer | M2 | Low pressure mercury | 253.7 | 2 | Distance 3-5 cm  30 seconds | 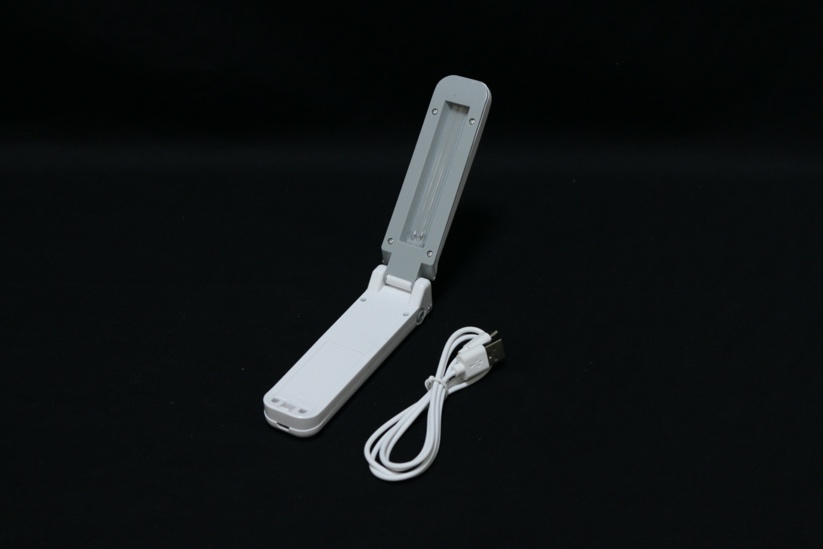 |
| 1. Mini USB Ultraviolet Lamp model: US-ZB158 | L1 | LED | UVC 265-280  UVA 395-400 | 4.5 | - It is recommended to keep 3 cm and sweep and hold for 2s evenly over objects.  - It is recommended to use for 1-3 minutes each time, tend to get heat after using for a long time. | 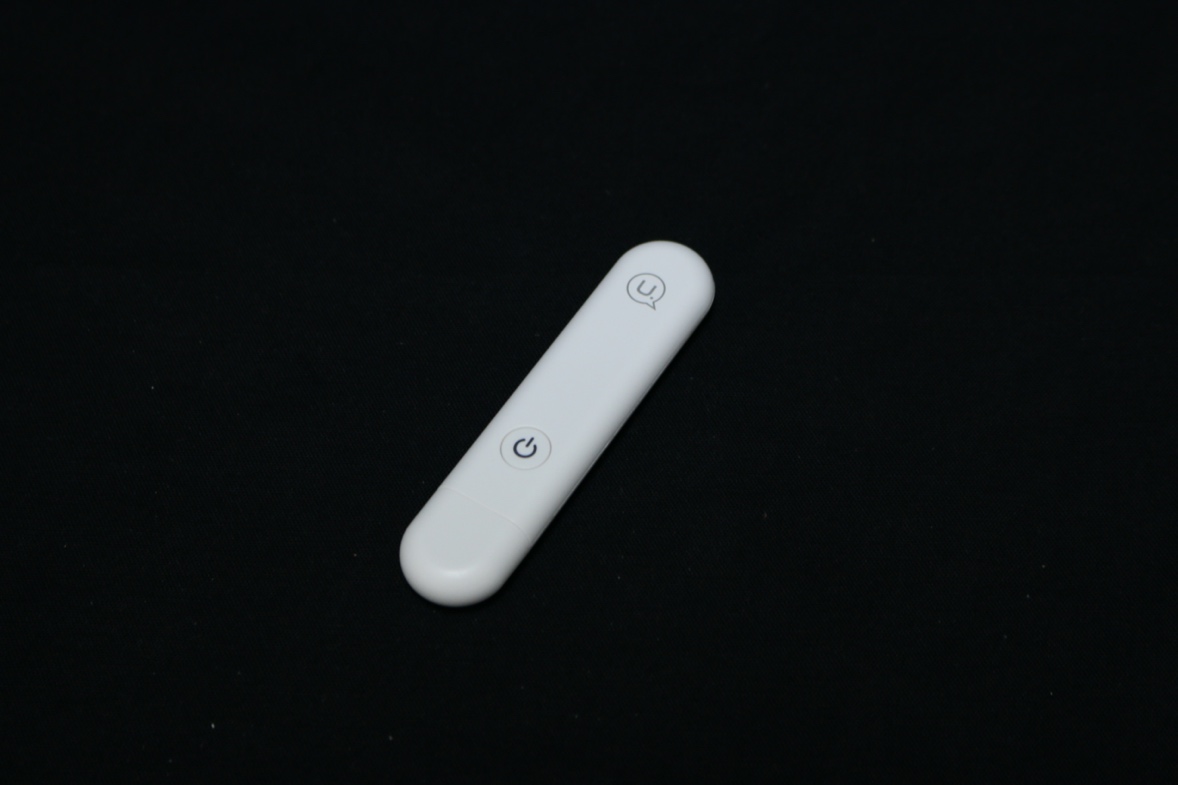 |
|  | M3 | Low pressure mercury |  | 24 | Local made | NA |
| 1. Baby miniUV | M4 | Low pressure mercury | 253.7 | 8 | 11/16/21 minutes | 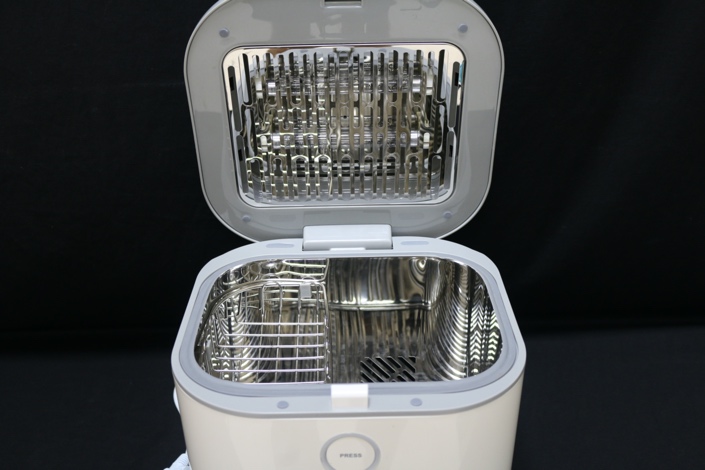 |
